1 Biofilm thickness matters: Deterministic assembly of different functions and communities in  
2 nitrifying biofilms.

3

4 Carolina Suarez, <sup>a,b</sup># Maria Piculell,<sup>c</sup> Oskar Modin,<sup>b</sup> Silke Langenheder<sup>d</sup>, Frank Persson,<sup>b</sup> Malte  
5 Hermansson<sup>a</sup>

6

7 <sup>a</sup>Department of Chemistry and Molecular Biology/Microbiology, University of Gothenburg,  
8 Sweden

9 <sup>b</sup>Water Environment Technology, Department of Architecture and Civil Engineering, Chalmers  
10 University of Technology, Sweden

11 <sup>c</sup>Veolia Water Technologies AB – AnoxKaldnes, Lund, Sweden

12 <sup>d</sup>Department of Ecology and Genetics/Limnology and Erken Laboratory, Uppsala University,  
13 Sweden

14

15 Running title: Biofilm thickness

16

17 #Address correspondence to Carolina Suarez, [carolina.suarez@cmb.gu.se](mailto:carolina.suarez@cmb.gu.se)

18

19 Abstract word count: 229

20 Text work count: 4734

## 21 **ABSTRACT**

22 Microbial biofilms are important in natural ecosystems and in biotechnological applications.  
23 Biofilm architecture influences organisms' spatial positions, who their neighbors are, and redox  
24 gradients, which in turn determine functions. We ask if and how biofilm thickness influences  
25 community composition, architecture and functions. But biofilm thickness cannot easily be  
26 isolated from external environmental factors. We designed a metacommunity system in a  
27 wastewater treatment plant, where either 50 or 400  $\mu\text{m}$  thick nitrifying biofilms were grown  
28 simultaneously on biofilm carriers in the same reactor. Model simulations showed that the 50  $\mu\text{m}$   
29 biofilms could be fully oxygenated whereas the 400  $\mu\text{m}$  biofilms contained anaerobic zones. The  
30 50 and 400  $\mu\text{m}$  biofilms developed significantly different communities. due to deterministic  
31 factors were stronger than homogenizing dispersal forces in the reactor, despite the fact that  
32 biofilms experienced the same history and external conditions. Relative abundance of aerobic  
33 nitrifiers was higher in the 50  $\mu\text{m}$  biofilms, while anaerobic ammonium oxidizers were more  
34 abundant in the 400  $\mu\text{m}$  biofilms. However, turnover was larger than the nestedness component  
35 of between-group beta-diversity, i.e. the 50  $\mu\text{m}$  biofilm was not just a subset of the thicker 400  
36  $\mu\text{m}$  biofilm with reduced taxa richness. Furthermore, the communities had different nitrogen  
37 transformation rates. The study shows that biofilm thickness has a strong impact on community  
38 composition and ecosystem function, which has implications for biotechnological applications,  
39 and for our general understanding of biofilms.

40

## 41 **IMPORTANCE**

42 Microorganisms colonize all surfaces in water and form biofilms. Diffusion limitations form  
43 steep gradients of energy and nutrient sources from the water phase into the deeper biofilm parts,

44 influencing community composition through the biofilm. Thickness of the biofilm will affect  
45 diffusion gradients, and is therefore presumably important for biofilm composition. Since  
46 environmental factors determine thickness, studies of how thickness influences biofilm functions  
47 and community assembly, have been difficult to perform. We studied biofilms for wastewater  
48 treatment with fixed thicknesses of 50 and 400  $\mu\text{m}$  during otherwise similar conditions and  
49 history. Despite growing in the same wastewater reactor, 16S rRNA gene sequencing and  
50 confocal microscopy showed the formation of two different communities, performing different  
51 ecosystem functions. Using statistical methods, we show for the first time, how biofilm thickness  
52 influences community assembly. The results help our understanding of the ecology of microbial  
53 biofilms, and in designing engineered systems based on ecological principles.

## 54 INTRODUCTION

55 Biofilms are dense communities, encased in a polymer matrix, attached to a surface and/or each  
56 other (1) with a high microbial diversity compared to the bulk water system (1-3). Microbial  
57 biofilms are important in aquatic ecosystems and are useful in many biotechnological  
58 applications, such as wastewater- or drinking water treatment. In nitrogen removal from  
59 wastewater, moving bed biofilm reactors (MBBRs) are used at many wastewater treatment plants  
60 (WWTPs). Here biofilms grow on so-called carriers, which move freely in the bioreactor (Fig.  
61 1C). An MBBR can be seen as a metacommunity (4), just as other WWTP systems such as  
62 activated sludge flocs and granules, where each free-floating biofilm carrier represents a local  
63 community. The local communities have defined boundaries and are separate, but linked by  
64 dispersal with all other biofilm carriers in the reactor, in this case fed with wastewater from a  
65 full-scale WWTP to form nitrifying biofilms. The reactor represents the regional level and is  
66 assumed to be a spatially implicit system, i.e. dispersal is likely to be equal between all carriers  
67 (4).

68

69 The mechanisms of community assembly are central in microbial ecology and in our  
70 understanding of formation of biodiversity in all ecosystems (5, 6), including microbial  
71 communities in biofilms (7). Communities are formed by deterministic and stochastic factors  
72 that include four major ecological processes: selection, drift, dispersal and speciation (8).  
73 Selection, i.e. the sorting of species by prevailing local abiotic and biotic conditions, is  
74 deterministic, while drift results from stochastic birth and death events (6, 8). If local  
75 communities are further exposed to stochastic dispersal from the regional species pool (as we can  
76 assume to be the case of bioreactors in WWTPs), the expected result is that the abundance of a

77 taxon in a local community can be predicted based on its respective abundance in the regional  
78 species pool and thereby follows neutral distribution patterns (9, 10). However, dispersal can  
79 also be deterministic if microorganisms differ in their ability to disperse within the complex  
80 spatial biofilm matrix or if their propagation is affected by interactions with species already  
81 present in the biofilm.

82

83 Selection has been suggested as the major mechanism for community assembly in stream  
84 biofilms (11-13), and other biofilms (14), while for biofilms within lakes linked by dispersal,  
85 both stochastic and deterministic factors were shown to be important (15). The importance of  
86 both stochastic and deterministic factors was shown in an elegant study using parallel microbial  
87 electrolysis cells incubated with wastewater (16). Other studies in wastewater activated sludge  
88 systems have shown the importance of deterministic and stochastic factors (17-20).

89

90 Deterministic assembly in biofilms could be due to specific mechanisms: Firstly, diffusion  
91 limitations form steep gradients of electron donors and acceptors in biofilms, which result in  
92 structured micro-environments. Examples are found in biofilms in WWTPs used for nitrification  
93 (i.e. oxidation of ammonium to nitrate) during the nitrogen removal process (21, 22). Here  
94 population stratification typically occurs; ammonia oxidizing bacteria (AOB) are found closest to  
95 the oxygenated water and nitrite oxidizing bacteria (NOB) below the AOB (23-26). If oxygen is  
96 consumed, anaerobic ammonium oxidizing (anammox) bacteria can establish in the deeper parts  
97 of the biofilm (23, 27, 28). Similarly, in other multispecies biofilms anaerobic sulfate reducing  
98 bacteria are found in the biofilm interior (29). However, functions in microbial communities are

99 not always sorted according to such a thermodynamic “redox tower” of electron acceptor (30).  
100 This makes detailed *a priori* predictions of community structure in biofilms difficult. Secondly,  
101 in addition to gradients, it was realized early on that microbial biofilms are in fact complex  
102 structures and not homogenous layers of randomly distributed organisms (3) and, ever since,  
103 architecture has been viewed as an important biofilm property. The intricate biofilm architecture  
104 consists of towers, mushroom-like structures and water filled channels (1, 2, 7, 31). If biofilms  
105 differ in their architecture, dispersal effects could influence community assembly by changing  
106 the colonization surface available. Furthermore, microorganism with deterministic dispersal  
107 might show preference towards different types of biofilms.

108  
109 Thickness will influence biofilm architecture and redox gradients and thus generally the local  
110 biofilm environment. However, the experimental evidence for effects of thickness on  
111 architecture, community structure and function has been difficult to obtain because biofilm  
112 thickness is the result of environmental conditions such as flow (1, 7, 32-34), nutrient conditions  
113 (24), development age of the biofilm (34), carbon to nitrogen (C/N) ratios (25) and temperature  
114 (35). In most experimental systems, thickness cannot easily be isolated from these environmental  
115 factors that themselves can influence the community structure and functions.

116  
117 Recently, a biofilm carrier with a defined grid wall height that defines the biofilm thickness was  
118 designed (Z-carriers, Veolia Water Technologies AB – AnoxKaldnes, Lund, Sweden) (36-38).  
119 These carriers allow stringent experiments with different biofilm thicknesses, which have shown  
120 that thickness can affect some biofilm functions (38, 39), evenness (39), biofilm architecture

121 (37), abundance of key organisms (37, 39) and functional stability after a disturbance (37).  
122 Beside the opportunities to gain basic ecological knowledge by designing new experiments, the  
123 ability to control biofilm thickness opens for new process configurations in WWTPs. In this  
124 study, a pilot nitrifying bioreactor was filled with a mixture of Z-carriers with biofilm  
125 thicknesses of 50 and 400  $\mu\text{m}$ . Thus, environmental conditions and history of the biofilms were  
126 the same. We ask if thickness, in itself or via diffusion effects or other mechanisms, is important  
127 for bacterial community structure, and if so, what the possible mechanisms of community  
128 assembly would be. The thicknesses we investigated are within the range commonly found in  
129 natural- as well as in man-made biofilms (25, 26, 32, 40, 41).

130  
131 Differences in communities, i.e. beta-diversity between thin and thick biofilms, could arise due  
132 to (a) turnover (species replacement) or (b) nestedness resulting from differences in alpha-  
133 diversity (42), which can both result from deterministic (e.g. environmental gradients) and  
134 stochastic factors (e.g. dispersal and drift) (42, 43). For example, as thicker biofilms have larger  
135 volume and surface-area, they are by chance expected to be colonized by more species, leading  
136 to higher richness. A possible deterministic mechanism for higher richness in 400 compared to  
137 50  $\mu\text{m}$  biofilms would be if redox profiles differ between them. Generally, the nitrifying  
138 bioreactor is an oxic environment and the presence of aerobic taxa is expected. However, if  
139 anoxic regions exist in thick biofilms, this would allow the establishment of anaerobic taxa,  
140 increasing species richness. In this case, we hypothesize that the 50  $\mu\text{m}$  biofilm community  
141 would be a subset of the richer 400  $\mu\text{m}$  biofilm community, due to anaerobic taxa being  
142 restricted to the thicker 400  $\mu\text{m}$  biofilms, while the same aerobic taxa occur in both the 50 and  
143 400  $\mu\text{m}$  biofilms. Alternatively, turnover, i.e. differences in species identity, could arise if

144 biofilms of different thickness have different environmental conditions apart from redox profiles.  
145 Finally, we also measured rates of nitrogen transformations in the two biofilms and investigated  
146 whether possible differences in ammonia- and nitrite removal rates between biofilms of distinct  
147 thicknesses are primarily linked to differences in taxa richness (i.e. nestedness) or identity (i.e.  
148 turnover) and discuss the implications of the results for wastewater treatment.

149

## 150 **RESULTS**

### 151 **Two different biofilms**

152 We grew biofilm communities with a maximum thickness of 50  $\mu\text{m}$  and 400  $\mu\text{m}$  together in the  
153 same bioreactor; these communities are referred to as Z50 and Z400. CLSM images of EPS  
154 stained biofilm cryosections confirmed that carrier design limited biofilm thickness (Fig. 1A and  
155 B).

156

### 157 **Alpha and beta diversity**

158 The alpha diversity parameters richness ( ${}^0\text{D}$ ), first-order diversity ( ${}^1\text{D}$ ) and evenness ( ${}^1\text{D}/{}^0\text{D}$ )  
159 (Fig. 2A), were all significantly higher for the thick Z400 biofilms than for the thinner Z50  
160 biofilms (Welch t-test,  $p < 0.05$ ). We also estimated beta diversity using the presence-absence  
161 based Sørensen index ( $\beta_{\text{sor}}$ ), which showed that Z50 and Z400 communities were different  
162 (PERMANOVA  $\beta_{\text{sor}}$ ,  $p = 0.002$ ,  $r^2 = 0.50$ ) (Fig. 2B).

163



164 We used null modelling to estimate the standardized effect size (SES) for  $\beta_{\text{sor}}$ . We observed that  
165  $\beta_{\text{sor}}$  values for between-group comparisons, i.e. between Z50 and Z400, were higher than  
166 expected by chance  $\beta_{\text{sor}}$  values for between-group comparisons ( $\text{SES}_{\beta_{\text{sor}}} > +2$ ) (Fig. 3A)  
167 indicating that between-group differences were likely deterministic. On the contrary, observed  
168  $\beta_{\text{sor}}$  values for within-group comparisons, i.e. between the carriers of the same type, were not  
169 more different than expected by chance ( $|\text{SES}_{\beta_{\text{sor}}}| < 2$ ) (Fig. 3A). In addition, estimation of the  
170 quantitative  $\text{RC}_{\text{BRAY}}$  metric, also indicated that Z50 and Z400 communities were in average more  
171 dissimilar than the null expectation (between-group  $\text{RC}_{\text{BRAY}} > +0.95$ )

172

173 To determine whether the between-group beta diversity was due to nestedness or turnover, we  
174 estimated the components of  $\beta_{\text{sor}}$ ; turnover ( $\beta_{\text{sim}}$ ) and dissimilarity due to nestedness ( $\beta_{\text{sne}}$ ) using  
175 the Baselga framework (42) (Fig. 3B), to estimate the  $\beta_{\text{ratio}}$  (44). When  $\beta_{\text{ratio}}$  is smaller than 0.5,  
176 beta diversity is dominated by turnover rather than  $\beta_{\text{sne}}$  (44). We observed a between-group  $\beta_{\text{ratio}}$   
177 lower than 0.5 (Fig. 3C). The differences between the Z50 and Z400 communities due to  
178 turnover were significant (PERMANOVA  $\beta_{\text{sim}}$ ,  $p=0.001$ ,  $r^2=0.34$ ). Thus, the beta diversity  
179 between the Z50 and Z400 communities was caused by both nestedness and turnover, with  
180 turnover being more important.

181

182 Differences in relative abundance of taxa between Z50 and Z400 were estimated using DESeq2.  
183 We found differential abundance ( $p_{(\text{adj})} < 0.01$ , DESeq2) for 45% of the sequence variants (SVs)  
184 analyzed with DESeq, while for the top 40 most abundant SVs, 32 had different abundance  
185 between Z50 and Z400 (Fig. S1). Among the fraction with differential abundance, 26% of SVs

186 were more abundant in Z50, and 74% were more abundant in Z400. The effect of thickness on  
187 relative abundance, if any, differed among taxa (for example see Fig. S1).

188

### 189 **Between-group sorting of nitrifiers and anammox bacteria**

190 The relative read abundance of the nitrifiers, *Nitrosomonas*, *Nitrospira* and *Nitrotoga*, was lower  
191 in the Z400 biofilms with *Nitrotoga* being almost restricted to Z50 (Fig. 4A). The same trends  
192 were noticed using quantitative fluorescence in situ hybridization (qFISH; Fig. 4C; Welch's t-  
193 test,  $p < 0.05$ ). It was not possible to detect by qPCR if comammox were present due to non-  
194 specific amplification using *Nitrospira amoA* primers (45).

195

196 Interestingly, we observed the anammox bacterium *Brocadia* in the Z400 biofilms, but it was  
197 almost absent in the Z50 biofilms (Fig. 4A). This was supported by qFISH (Welch t-test  
198  $p < 0.001$ ) (Fig. 4C). Sorting of bacteria between thick and thin biofilms was not only limited to  
199 primary producers (i.e. autotrophic nitrogen converters) but also seen among the predatory  
200 *Bdellovibrionales*. *Bacteriovorax* had a higher abundance in the Z50 communities, while some  
201 SVs classified as *Bdellovibrio* were more abundant in either Z400 or Z50 (Fig. S2).

202

203 FISH analyses of biofilm cryosections showed that the Z400 biofilm was stratified, e.g. with  
204 *Nitrospira* being more abundant in the middle of the biofilm and the anaerobic anammox  
205 bacteria being present in the deeper layers; a lack of stratification was observed *Nitrosomonas*  
206 (Fig. 5A and 5B). In the thin Z50 biofilms, no stratification was observed as the AOB and NOB

207 populations were located side by side (Fig. 5C). The calculated dissolved oxygen (DO)  
208 concentration profiles in the biofilms are shown in Fig. 6; the results give a range of possible DO  
209 concentration profiles, which are shown as shaded regions. The model predicts that Z50 biofilms  
210 can be fully oxygenated but may also have anoxic regions, whereas the Z400 biofilms contain a  
211 completely anoxic region in its deeper parts in all tested scenarios.

212

### 213 **Nitrogen transformation rates**

214 Two types of tests were performed separately on the Z50 and Z400 carriers; (i) actual activities  
215 tested in a continuous laboratory trial, with the same incoming water as in the 0.5 m<sup>3</sup> reactor and  
216 (ii) potential activities tested in batch trials where excess nitrogen was added. For all trials,  
217 removal rates are reported per surface area and day. Actual rates of net NO<sub>3</sub><sup>-</sup> production were  
218 1.4-1.5 gNO<sub>3</sub><sup>-</sup>-N/m<sup>2</sup>, d for Z50 and 0.68-0.72 gNO<sub>3</sub><sup>-</sup>-/m<sup>2</sup>, d for Z400. To estimate NO<sub>3</sub><sup>-</sup>  
219 production per nitrifier abundance, it is necessary to consider differences in biomass between  
220 carriers. We estimate that the total nitrifier biomass per carrier surface was about the same in  
221 Z50 and Z400 (Fig. 4B). Therefore, per nitrifier biomass, net NO<sub>3</sub><sup>-</sup> production was higher in Z50  
222 than in Z400.

223

224 In the aerobic potential tests for net NH<sub>4</sub><sup>+</sup> removal (Fig. 7A), net NO<sub>3</sub><sup>-</sup> and net NO<sub>2</sub><sup>-</sup> production  
225 (per carrier area) was higher for Z50 than Z400 biofilms (ANCOVA, p<0.05), while the rate of  
226 net NH<sub>4</sub><sup>+</sup> removal was not significantly different between Z50 and Z400 (ANCOVA, p>0.05).  
227 The aerobic potential removal of NO<sub>2</sub><sup>-</sup> (Fig. 7B) was significantly higher for Z400 than for Z50  
228 (ANCOVA, p<0.05). Finally, in the anoxic potential trials, in which NH<sub>4</sub><sup>+</sup> and NO<sub>2</sub><sup>-</sup> were added

229 simultaneously (Fig. 7C), removal of  $\text{NO}_2^-$  was significantly higher for Z400 than for Z50  
230 (ANCOVA,  $p < 0.05$ ), while no significant removal or production of  $\text{NH}_4^+$  was seen for either  
231 Z50 or Z400.

232

## 233 **DISCUSSION**

234 Although incubated in the same bioreactor and experiencing the same conditions and the same  
235 history, different microbial communities developed on carriers with thin and thick biofilms (Fig.  
236 2B). The thicker Z400 biofilm had a higher richness and evenness than the thinner Z50 biofilm  
237 (Fig. 2A) and our results are therefore in agreement with known positive species-area  
238 relationships for microbial communities (46). Moreover, similar to our results, Torresi et al. (39),  
239 focusing on micro-pollutant degradation, also found a significant higher evenness in thicker  
240 biofilms.

241

242 A null model approach was used to investigate if the differences in beta-diversity between Z50  
243 and Z400 were due to deterministic or stochastic factors while accounting for the large  
244 differences in richness between Z50 and Z400 (47). The results showed that the between-group  
245 beta-diversity was higher than expected by chance (Fig. 3A), suggesting deterministic assembly  
246 due to differences in biofilm thickness. This result was also confirmed by the fact that biofilm  
247 thickness significantly affected the relative abundance of the majority of the most abundant  
248 individual taxa, meaning that they showed clear preference for either thin or thick biofilms (Fig.  
249 S1). Some turnover among the Z50 and Z400 replicates was observed, and was also expected  
250 due to ecological drift. Low SES values (Fig. 3A) suggest stochastic assembly among replicates,

251 however, the relative importance of drift and dispersal cannot be disentangled with the  
252 experimental setup used here. In addition, due to the limited number of within-group replicates,  
253 these results should be interpreted with caution. Because MBBRs allow a high level of  
254 replication in communities linked by dispersal, a similar setup to the one use here with higher  
255 replication could be used to study stochastic assembly and to confirm the possible existence of  
256 alternate states (16, 48). Overall, other studies have shown that stochastic and deterministic  
257 processes can co-occur in biofilms (15, 17, 18). Our results suggest that the importance of  
258 deterministic vs. stochastic assembly depends on biofilm thickness: assembly would be  
259 deterministic between biofilms of different thickness, while assembly would likely be stochastic  
260 among biofilms with the same thickness.

261  
262 Our hypothesis was that the communities in Z50 would be an aerobic subset of the ones in Z400.  
263 Thus, beta-diversity between Z50 and Z400 would largely be due to nestedness, whereas  
264 turnover would have a small contribution. This was expected due to different redox profiles  
265 between Z50 and Z400 biofilms (Fig. 6) which could create nestedness; oxygen in the thin Z50  
266 biofilm inhibit the growth of obligate anaerobes like anammox bacteria (49). Thus, richness in  
267 Z400 would be higher, because the community is a mixture of aerobic and anaerobic taxa.  
268 Surprisingly, although between-group  $\beta_{\text{sne}}$  was observed, the  $\beta_{\text{ratio}}$  was below 0.5 (Fig. 3C),  
269 indicating that beta-diversity was dominated by turnover. Thus, the Z50 biofilm was not just a  
270 subset of the oxic upper layers of the Z400 biofilm, but differences were primarily due to  
271 turnover of taxa. For example, *Nitrotoga* was observed in Z50, but was nearly absent in Z400  
272 (Fig. 4, S1), which cannot be easily explained by redox profiles. Independently of the

273 mechanism, it appears that thin biofilms favor the NOB *Nitrotoga*, which could have  
274 consequences for operational strategies in wastewater treatment.

275

276 Redox profiles (Fig. 6) explain the stratification of some taxa like anammox bacteria and  
277 *Nitrospira* in the Z400 biofilm (Fig. 5B). *Nitrosomonas* was the dominant population at the top  
278 of the Z400 biofilm (Fig. 5A, S3C) and was also abundant in Z50. However, *Nitrosomonas*  
279 aggregates were present throughout the Z400 biofilm, even in regions predicted to be anoxic  
280 (Fig. 5A, 5B). Furthermore, in the thin Z50 biofilm, *Nitrospira* was seen alongside *Nitrosomonas*  
281 (Fig. 5C), and here its relative abundance was actually higher than in Z400. Hence redox profiles  
282 alone cannot explain the distribution of taxa in the reactor. The fact that redox is not the only  
283 determinant of the distribution of microorganisms, even in strongly structured environments like  
284 sediments, has been noted (30). The Z50 and Z400 biofilms also differed in their spatial  
285 structure, with Z50 being more dense and having a smoother architecture, compared with the  
286 Z400 (Fig. 1) (37); furthermore extracellular nucleic acids were observed in Z400 but not in Z50  
287 (data not shown). Thus, these differences could contribute to the deterministic turnover observed  
288 in this study, by either selection or deterministic dispersal. Another possible mechanism for  
289 between-group species turnover are biotic interactions. For instance, some SVs within the  
290 predatory *Bdellovibrionales* were differently distributed between the biofilms (Fig. S2). It is  
291 plausible that the two biofilms represented different prey communities that in turn shaped the  
292 predatory *Bdellovibrionales* communities. Such influence on the predatory *Bacteriovorax* has  
293 been shown, even for closely related preys (50, 51). Furthermore, Torsvik et al. suggested that  
294 predation can act as a major factor driving prokaryotic diversity (52). Hence, biological

295 interactions, such as predation, could have had a large effect on these biofilm communities, as  
296 shown for other wastewater biofilms (53).

297

298 Differences in community composition between Z50 and Z400 were to a larger extent  
299 determined by turnover than nestedness. Therefore, we predict that differences in nitrogen  
300 transformation rates among them might not necessarily be linked to the differences in richness  
301 and evenness between Z50 and Z400. This is despite previous examples that have shown that  
302 species richness (46) and evenness (54) may by themselves lead to higher productivity. Similar  
303 to earlier studies (39), we found that the thinner biofilm had higher net  $\text{NO}_3^-$ -production rates,  
304 despite having lower richness. This supports that species composition might be more important  
305 than alpha-diversity for some processes (55), such as nitrification. Moreover, increased evenness  
306 in the Z400 compared to Z50 biofilms could have resulted in lower abundance of specialized  
307 taxa (56, 57), such as *Nitrosomonas* and *Nitrospira*, and thereby decrease net  $\text{NO}_3^-$ -production  
308 rates. Despite differences in relative abundance in *Nitrosomonas*, their absolute abundance was  
309 estimated to be the same in both Z50 and Z400. When measuring *Nitrosomonas* abundance, it is  
310 assumed that the entire population might contribute to aerobic ammonia oxidation. However we  
311 observed *Nitrosomonas* microcolonies throughout the Z400 biofilm depth (Fig 5A); the ones  
312 living in the deeper parts of the biofilm might have little or no access to oxygen (58). These  
313 *Nitrosomonas* cells could have low nitrification activity or they could represent strains capable of  
314 anaerobic respiration (59). Therefore, *Nitrosomonas* abundance might not be directly correlated  
315 with nitrification rates in thick biofilms.

316

317 A different ecosystem function, anaerobic  $\text{NO}_2^-$  removal could occur via denitrification,  
318 anammox or DNRA. We observed higher anaerobic  $\text{NO}_2^-$  removal rates in Z400 than Z50. This  
319 could be due to deterministic assembly, where the presence of anaerobic regions in Z400, likely  
320 allowed the establishment of taxa that could use  $\text{NO}_2^-$  as electron acceptor. This agrees with a  
321 previous study (39), showing that an increase in biofilm thickness could lead to the emergence of  
322 new functions. Higher aerobic  $\text{NO}_2^-$  removal in Z400 could occur because of  $\text{NO}_2^-$  being used  
323 both as electron donor by NOB, and as electron acceptor by anaerobic taxa in anaerobic regions  
324 of the Z400.

325

326 In summary, we show that biofilm thickness can influence bacterial biofilm community  
327 composition despite the fact that history and all other external conditions are similar. The  
328 differences in communities between thin and thick biofilms were likely deterministic, but  
329 differences could not always be easily explained just by differences in redox conditions (*cf.* (30).  
330 Between-group beta-diversity was due to both nestedness and turnover, but dominated by  
331 turnover. Furthermore, based on potential and actual measurements, the two communities  
332 performed ecosystem functions at different rates, which support the idea that beta-diversity in the  
333 same metacommunity can lead to the emergence of multiple ecosystem functions (60). Results  
334 from these and similar experiments can be used in design of new process strategies in wastewater  
335 treatment. For example, thinner nitrifying biofilms could be combined with thicker biofilms to  
336 increase the number of ecological functions (39). Finally, bioreactors are well suited for  
337 experiments that can help disentangle factors of community assembly, as also suggested before  
338 (6).

339



## 340 MATERIALS AND METHODS

### 341 The reactor

342 The 0.5 m<sup>3</sup> MBBR was located at the Sjölanda WWTP in Malmö, Sweden. The reactor was fed  
343 with effluent from a high-rate activated sludge process treating municipal wastewater (a feed  
344 with low carbon to nitrogen ratio). The average reactor load during one month before the  
345 sampling was 0.48 kg NH<sub>4</sub><sup>+</sup>-N/m<sup>3</sup>,day and the NH<sub>4</sub><sup>+</sup> removal was 42%, at a pH of 7.4; dissolved  
346 oxygen (DO) concentration of 5 mg/L; and temperature of 17°C. After 261 days of operation,  
347 carriers were sampled for DNA-sequencing, FISH and activity tests to determine nitrogen  
348 transformations. The reactor contained a mixture of Z50 and Z400 carriers (Veolia Water  
349 Technologies AB – AnoxKaldnes, Lund, Sweden) at a total filling degree of approximately 30%.  
350 Thickness of the biofilm in Z-carriers is limited by a pre-defined grid wall height (36). Samples  
351 for optical coherence tomography measurements were taken on day 272 and data showed a  
352 biofilm thickness of 45 ±17 and 379 ± 47 (mean ± S.D.) µm for Z50 and Z400, respectively (37).

353

### 354 Nitrogen transformation activity tests

355 Actual activity was measured in 1 L reactors in duplicate: Two reactors with 100 Z50 carriers  
356 each, and two with 100 Z400 carriers each. The incoming water was the same as the water  
357 feeding the 0.5 m<sup>3</sup> reactor. At the time of measurement, the NH<sub>4</sub><sup>+</sup>-N concentration was 19.6  
358 mg/L, the DO was 5.5 mg/L, and the temperature was kept at 20°C. Mixing was achieved by  
359 supplying a gas mix consisting of N<sub>2</sub>-gas and air to the bottom of the reactors at an approximate  
360 total flow of 3 L/min and the DO was controlled to 5.5 mg/L by adjusting the amount of air in

361 the gas mix. Nitrification rates were measured from mass balance as  $\text{NO}_2^-$ -N and  $\text{NO}_3^-$ -N  
362  $\text{mg/m}^2$ ,day.

363

364 For the potential activity trials 3 L reactors, containing 400 carriers each, were used. The  
365 substrate consisted of  $\text{NaHCO}_3^-$  buffer, pH adjusted to 7.5 using  $\text{H}_2\text{SO}_4$ , with phosphorous and  
366 trace minerals added in excess (36). Aerobic removal of  $\text{NH}_4^+$  (starting concentration 35.2  $\text{NH}_4^+$ -  
367 N mg/l) and  $\text{NO}_2^-$  (starting concentration 32.5  $\text{NO}_2^-$ -N mg/l) were measured separately in two  
368 different trials at 20°C for 1 hour, with sampling every 10 minutes. Mixing was achieved by  
369 supplying a gas mix consisting of  $\text{N}_2$ -gas and air to the bottom of the reactors at an approximate  
370 total flow of 3 L/min. DO was controlled to 5.5 mg/L by adjusting the amount of air in the gas  
371 mix. Anaerobic trials of simultaneous removal of  $\text{NH}_4^+$  and  $\text{NO}_2^-$  (starting concentrations 35.5  
372  $\text{NH}_4^+$ -N and 36.1  $\text{NO}_2^-$ -N mg/l) was measured at 30°C and were run for 2 hours with sampling  
373 every 20 minutes. Mixing was achieved by  $\text{N}_2$ -gas from the reactor bottom. Before commencing  
374 the trials, the reactor with substrate was fed with  $\text{N}_2$ -gas until the DO concentration was  
375 negligible and thereafter the carriers were added and the trials begun. Water samples were  
376 collected and filtered through 1.6  $\mu\text{m}$  Munktell MG/A glass fiber filters and analyzed for  $\text{NH}_4$ -N,  
377  $\text{NO}_2$ -N and  $\text{NO}_3$ -N using standard Hach-Lange kits (LCK 303, 342 and 339, respectively).

378

### 379 **Fluorescence in situ hybridization (FISH)**

380 FISH on cryosections and qFISH were done as previously described (37). The FISH probes used  
381 in this study are shown in Table S1. EPS and total nucleic acids on biofilm cryosections were

382 stained with the FilmTracer SYPRO Ruby biofilm matrix stain and SYTO 40 (Thermo Fischer  
383 Scientific, USA), respectively. See Text S1, for details.

384

### 385 **Simulation of dissolved oxygen (DO) concentration profiles**

386 A mathematical model was developed for simulating DO concentration profiles in the biofilms.  
387 The model considered the activities of aerobic heterotrophic bacteria, AOB and NOB. The bulk  
388 liquid concentrations of substrates (DO, nitrite, ammonium, and organic compounds), the  
389 measured biofilm densities, the microbial community compositions (as determined by FISH), the  
390 distribution of different functional groups of microorganisms in the biofilm (as measured by  
391 FISH), and kinetic coefficients from the scientific literature were used as input parameters. The  
392 thickness of the liquid boundary layer that limits diffusion of soluble substrates, including DO,  
393 from the bulk liquid to the biofilm was determined by comparing the ammonium oxidation rates  
394 calculated by the model to those measured during the nitrogen transformation activity tests.  
395 Since the exact concentrations of active biomass in the biofilms were unknown, the model was  
396 solved for different scenarios in which the active biomass was assumed to make up 20-80% of  
397 the measured total dry solids. It should be noted that the model only considers biofilm  
398 heterogeneity in one dimension (the depth direction). Layers parallel to the substratum are  
399 assumed to be homogenous. Real biofilms are three-dimensional structures containing channels  
400 and voids, which may allow oxygen transport into deeper regions locally. See Text S1 for details.

401

### 402 **DNA extraction and 16S rRNA gene sequencing**

403 DNA was separately extracted from ten Z50 and ten Z400 carriers. DNA extraction, PCR and  
404 high throughput amplicon sequencing of 16S rRNA gene was done as previously described (61)  
405 with some modifications. Sequence variants (SVs) were generated for finer resolution of taxa  
406 (62, 63). See Text S1 for details. Raw sequence reads were deposited at the NCBI Sequence Read  
407 Archive, no. SRP103666.

408

## 409 **Statistics**

410 Data was analyzed in R (R Core Team 2018), using the packages Phyloseq (64), Vegan (65),  
411 DESeq2 (66) and betapart (42). Differential abundance of SVs was estimated with DESeq2 (66,  
412 67), without random subsampling before the analysis. After independent filtering in DESeq2,  
413 2578 of 3690 SVs were analyzed. A  $p_{(adj)} < 0.01$  value (DESeq2) was used as criterion for  
414 statistical significance. Subsampling to even depth was done prior to estimation of alpha-  
415 diversity and beta-diversity. Alpha-diversity was calculated as the first two Hill numbers (68),  ${}^0D$   
416 (richness) and  ${}^1D$  (exponential of Shannon-Wiener index). Evenness was estimated as  $({}^1D/{}^0D)$ .  
417 Beta-diversity was estimated as pairwise Sørensen ( $\beta_{sor}$ ) dissimilarities, a presence-absence  
418 metric. Principal coordinate analysis (PCoA) was used for ordination. Permutational multivariate  
419 analysis of variance (PERMANOVA) (69) was used test for significant difference between group  
420 centroids. The components of  $\beta_{sor}$ , turnover ( $\beta_{sim}$ ) and dissimilarity due to nestedness ( $\beta_{sne}$ ), were  
421 estimated as described by Baselga et al. (42) and used to calculate the beta diversity ratio ( $\beta_{ratio}$ )  
422 as the ratio between  $\beta_{sne}$  and  $\beta_{sor}$  (44). If the  $\beta_{ratio}$  is smaller than 0.5, beta diversity is dominated  
423 by turnover rather than nestedness (44).

424

425 To disentangle the contribution of stochastic and deterministic community assembly mechanisms  
426 while at the same time accounting for possible differences in richness between Z50 and Z400, a  
427 null model approach was used. Firstly, the standardized effect size (SES) for pairwise Sørensen  
428 ( $SES_{\beta_{sor}}$ ) dissimilarities were estimated in vegan using the oecosimu function. 999 null  
429 communities for estimation of  $SES_{\beta_{sor}}$  were generated using the quasiswap algorithm (70), which  
430 preserve species richness and species incidence. For within groups null model analyses of Z50  
431 and Z400 communities, only the taxa present in Z50 or Z400 respectively were used as the  
432 regional species pool.  $|SES_{\beta_{sor}}| > 2$  was used as criteria to estimate if  $\beta_{sor}$  was different than  
433 expected by chance; a  $|SES| > 2$  value is approximately a 95% confidence interval (71).  
434 Secondly, the  $RC_{bray}$  metric (72), which is based on quantitative data, was estimated for between-  
435 group comparisons, using 999 simulated communities.  $|RC_{bray}| > 0.95$  values were interpreted as  
436 deviations from the random expectation (47, 72).

437

## 438 **ACKNOWLEDGEMENTS**

439 We thank Fred Sörensson for valuable discussions. The authors acknowledge the Genomics core  
440 facility at the University of Gothenburg, the Centre for Cellular Imaging at the University of  
441 Gothenburg and the National Microscopy Infrastructure, NMI (VR-RFI 2016-00968), for  
442 providing support and use of their equipment, and the colleagues at Veolia Water Technologies  
443 AB – AnoxKaldnes, Lund, Sweden, for monitoring the pilot reactor. This work was funded by  
444 FORMAS (Contract no. 243-2010-2259, 211-2010-140, 2015-1515-30425-28, 245-2014-1528,  
445 942-2015-683 and 2012-1433), SVU (Contract no. 10-105), the Foundations of Carl Trygger  
446 (CTS 12:374), Adlerbertska forskningsstiftelsen, Wilhelm & Martina Lundgrens Vetenskapsfond

447 (2015-0317, 2015-0309) and the Swedish Water & Wastewater Association via the research  
448 cluster VA-teknik Södra.

449 **Conflict of interest:** The authors declare no conflict of interest, MP work at Veolia Water  
450 Technologies AB – AnoxKaldnes, Lund, Sweden.

451

452

### 453 REFERENCES

- 454 1. Flemming H-C, Wingender J, Szewzyk U, Steinberg P, Rice SA, Kjelleberg S. 2016.  
455 Biofilms: An emergent form of bacterial life. *Nat Rev Microbiol* 14:563-575.
- 456 2. Battin TJ, Besemer K, Bengtsson MM, Romani AM, Packmann AI. 2016. The ecology and  
457 biogeochemistry of stream biofilms. *Nat Rev Microbiol* 14:251-263.
- 458 3. Costerton JW, Lewandowski Z, Caldwell DE, Korber DR, Lappin-Scott HM. 1995.  
459 Microbial biofilms. *Annu Rev Microbiol* 49:711-745.
- 460 4. Leibold MA, Holyoak M, Mouquet N, Amarasekare P, Chase JM, Hoopes MF, Holt RD,  
461 Shurin JB, Law R, Tilman D, Loreau M, Gonzalez A. 2004. The metacommunity concept:  
462 a framework for multi-scale community ecology. *Ecology Lett* 7:601-613.
- 463 5. Nemergut DR, Schmidt SK, Fukami T, O'Neill SP, Bilinski TM, Stanish LF, Knelman JE,  
464 Darcy JL, Lynch RC, Wickey P, Ferrenberg S. 2013. Patterns and processes of microbial  
465 community assembly. *Microbiol Mol Biol Rev* 77:342-356.
- 466 6. Zhou J, Ning D. 2017. Stochastic community assembly: Does it matter in microbial  
467 ecology? *Microbiol Mol Biol Rev* 81:e00002-17-32.
- 468 7. Battin TJ, Sloan WT, Kjelleberg S, Daims H, Head IM, Curtis TP, Eberl L. 2007.  
469 Microbial landscapes: new paths to biofilm research. *Nat Rev Microbiol* 5:76-81.
- 470 8. Vellend M. 2010. Conceptual synthesis in community ecology. *Quart Rev Biol* 85:183-  
471 206.
- 472 9. Hubbell SP. 2001. *The Unified Neutral Theory of Biodiversity and Biogeography*.  
473 Princeton University Press, Princeton.
- 474 10. Östman Ö, Drakare S, Kritzberg ES, Langenheder S, Logue JB, Lindström ES. 2010.  
475 Regional invariance among microbial communities. *Ecology letters* 13:118-127.
- 476 11. Besemer K, Peter H, Logue JB, Langenheder S, Lindström ES, Tranvik LJ, Battin TJ.  
477 2012. Unraveling assembly of stream biofilm communities. *ISME J* 6:1459-1468.
- 478 12. Besemer K, Singer G, Hödl I, Battin TJ. 2009. Bacterial community composition of stream  
479 biofilms in spatially variable-flow environments. *Appl Environ Microbiol* 75:7189-7195.
- 480 13. Lyautey E, Jackson CR, Cayrou J, Rols J-L, Garabétian F. 2005. Bacterial community  
481 succession in natural river biofilm assemblages. *Microb Ecol* 50:589-601.

- 482 14. Jackson CR, Churchill PF, Roden EE. 2001. Successional changes in bacterial assemblage  
483 structure during epilithic biofilm development. *Ecology* 82:555-566.
- 484 15. Langenheder S, Wang J, Karjalainen SM, Laamanen TM, Tolonen KT, Vilmi A, Heino J.  
485 2017. Bacterial metacommunity organization in a highly connected aquatic system. *FEMS*  
486 *Microbiol Ecol* 93:fiw225.
- 487 16. Zhou J, Liu W, Deng Y, Jiang YH, Xue K, He Z, Van Nostrand JD, Wu L, Yang Y, Wang  
488 A. 2013. Stochastic Assembly Leads to Alternative Communities with Distinct Functions  
489 in a Bioreactor Microbial Community. *mBio* 4:e00584-12-e00584-12.
- 490 17. Ofitearu ID, Lunn M, Curtis TP. 2010. Combined niche and neutral effects in a microbial  
491 wastewater treatment community. *Proc Natl Acad Sci USA* 107:15345–15350.
- 492 18. Ayarza JM, Erijman L. 2010. Balance of neutral and deterministic components in the  
493 dynamics of activated sludge floc assembly. *Microb Ecol* 61:486-495.
- 494 19. Griffin JS, Wells GF. 2017. Regional synchrony in full-scale activated sludge bioreactors  
495 due to deterministic microbial community assembly. *ISME J*  
496 doi:doi:10.1038/ismej.2016.121:1-12.
- 497 20. Lee S-H, Kang H-J, Park H-D. 2015. Influence of influent wastewater communities on  
498 temporal variation of activated sludge communities. *Water Research* 73:132-144.
- 499 21. Schramm A, Larsen LH, Revsbech NP, Ramsing NB, Amann R, Schleifer K-H. 1996.  
500 Structure and function of a nitrifying biofilm as determined by in situ hybridization and the  
501 use of microelectrodes. *Appl Environ Microbiol* 62:4641-4647.
- 502 22. Okabe S, Naitoh H, Satoh H, Watanabe Y. 2002. Structure and function of nitrifying  
503 biofilms as determined by molecular techniques and the use of microelectrodes. *Water*  
504 *Science and Technology* 46:233-241.
- 505 23. Almstrand R, Persson F, Hermansson M. 2014. Biofilms in nitrogen removal: Population  
506 dynamics and spatial distribution of nitrifying and anammox bacteria. *In* Marco D (ed),  
507 *Metagenomics of the microbial nitrogen cycle: Theory, methods and applications*. Caister  
508 Academic Press, Portland, USA
- 509 24. Lydmark P, Lind M, Sörensson F, Hermansson M. 2006. Vertical distribution of nitrifying  
510 populations in bacterial biofilms from a full-scale nitrifying trickling filter. *Environ*  
511 *Microbiol* 8:2036-2049.
- 512 25. Okabe S, Hiratia K, Ozawa Y, Watanabe Y. 1996. Spatial microbial distributions of  
513 nitrifiers and heterotrophs in mixed-population biofilms. *Biotechnol Bioeng* 50:24-35.
- 514 26. Persson F, Wik T, Sörensson F, Hermansson M. 2002. Distribution and activity of  
515 ammonia oxidizing bacteria in a large full-scale trickling filter. *Water Res* 36:1439-1448.
- 516 27. Persson F, Sultana R, Suarez M, Hermansson M, Plaza E, Wilén B-M. 2014. Structure and  
517 composition of biofilm communities in a moving bed biofilm reactor for nitrification-  
518 anammox at low temperatures. *Bioresour Technol* 154:267-273.
- 519 28. Suarez C, Persson F, Hermansson M. 2015. Predation of nitrification–anammox biofilms  
520 used for nitrogen removal from wastewater. *FEMS Microbiol Ecol* 91:fiw124.
- 521 29. Ramsing NB, Kuhl M, Jørgensen BB. 1993. Distribution of sulfate-reducing bacteria, O<sub>2</sub>,  
522 and H<sub>2</sub>S in photosynthetic biofilms determined by oligonucleotide probes and  
523 microelectrodes. *Appl Environ Microbiol* 59:3840-3849.
- 524 30. Chen J, Hanke A, Tegetmeyer HE, Kattelman I, Sharma R, Hamann E, Hargesheimer T,  
525 Kraft B, Lenk S, Geelhoed JS, Hettich RL, Strous M. 2017. Impacts of chemical gradients  
526 on microbial community structure. *ISMEJ*:1-12.



- 527 31. Hall-Stoodley L, Costerton JW, Stoodley P. 2004. Bacterial biofilms: from the Natural  
528 environment to infectious diseases. *Nat Rev Microbiol* 2:95-108.
- 529 32. Battin TJ, Kaplan LA, Newbold JD, Cheng X, Hansen C. 2003. Effects of current velocity  
530 on the nascent architecture of stream microbial biofilms. *Appl Environ Microbiol* 69:5443-  
531 5452.
- 532 33. Hödl I, Mari L, Bertuzzo E, Suweis S, Besemer K, Rinaldo A, Battin TJ. 2013. Biophysical  
533 controls on cluster dynamics and architectural differentiation of microbial biofilms in  
534 contrasting flow environments. *Environ Microbiol* 16:802-812.
- 535 34. Liu T, Quan X, Li D. 2017. Evaluations of biofilm thickness and dissolved oxygen on  
536 single stage anammox process in an up-flow biological aerated filter. *Biochem Eng J*  
537 119:20-26.
- 538 35. He J, Hu H, Qiu W, Liu J, Liu M, Zhao C, Shi X, Xu J. 2016. Community diversity and  
539 biofilm characteristic response to low temperature and low C/N ratio in a suspended carrier  
540 biofilm reactor. *Desal Wat Treat* 57:22212–22222.
- 541 36. Piculell M, Christensson M, Jönsson K, Welander T. 2016. Partial nitrification in MBBRs  
542 for mainstream deammonification with thin biofilms and alternating feed supply. *Water Sci*  
543 *Technol* 73:1253-1260.
- 544 37. Piculell M, Suarez C, Li C, Christensson M, Persson F, Wagner M, Hermansson M,  
545 Jönsson K, Welander T. 2016. The inhibitory effects of reject water on nitrifying  
546 populations grown at different biofilm thickness. *Water Res* 104:292-302.
- 547 38. Piculell M, Welander P, Jönsson K, Welander T. 2016. Evaluating the effect of biofilm  
548 thickness on nitrification in moving bed biofilm reactors. *Environ Technol* 37:732-743.
- 549 39. Torresi E, Fowler SJ, Polesel F, Bester K, Andersen HR, Smets BF, Plósz BG,  
550 Christensson M. 2016. Biofilm thickness influences biodiversity in nitrifying mbbbs—  
551 implications on micropollutant removal. *Environ Sci Technol* 50:9279-9288.
- 552 40. García S, Trueba A, Vega LM, Madariaga E. 2016. Impact of the surface roughness of  
553 AISI 316L stainless steel on biofilm adhesion in a seawater- cooled tubular heat  
554 exchanger-condenser. *Biofouling* 32:1-9.
- 555 41. Rao TS. 2009. Comparative effect of temperature on biofilm formation in natural and  
556 modified marine environment. *Aquat Ecol* 44:463-478.
- 557 42. Baselga A. 2010. Partitioning the turnover and nestedness components of beta diversity.  
558 *Global Ecology and Biogeography* 19:134-143.
- 559 43. Ulrich W, Almeida - Neto M, Gotelli Nicholas J. 2008. A consumer's guide to nestedness  
560 analysis. *Oikos* 118:3-17.
- 561 44. Dobrovolski R, Melo Adriano S, Cassemiro Fernanda AS, Diniz - Filho José Alexandre F.  
562 2011. Climatic history and dispersal ability explain the relative importance of turnover and  
563 nestedness components of beta diversity. *Global Ecology and Biogeography* 21:191-197.
- 564 45. Pjevac P, Schauburger C, Poghosyan L, Herbold CW, van Kessel MAHJ, Daebeler A,  
565 Steinberger M, Jetten MSM, Lückner S, Wagner M, Daims H. 2017. AmoA-Targeted  
566 Polymerase Chain Reaction Primers for the Specific Detection and Quantification of  
567 Comammox Nitrospira in the Environment. *Front Microbio* 8:847-11.
- 568 46. Bell T, Newman Ja, Silverman BW, Turner SL, Lilley AK. 2005. The contribution of  
569 species richness and composition to bacterial services. *Nature* 436:1157-1160.



- 570 47. Chase JM, Kraft NJB, Smith KG, Vellend M, Inouye BD. 2011. Using null models to  
571 disentangle variation in community dissimilarity from variation in  $\alpha$ -diversity. *Ecosphere*  
572 2:art24-11.
- 573 48. Pagaling E, Vassileva K, Mills Catherine G, Bush T, Blythe Richard A, Schwarz-Linek J,  
574 Strathdee F, Allen Rosalind J, Free A. 2017. Assembly of microbial communities in  
575 replicate nutrient-cycling model ecosystems follows divergent trajectories, leading to  
576 alternate stable states. *Environmental Microbiology* 19:3374-3386.
- 577 49. Strous M, Van Gerven E, Kuenen J, Jetten M. 1997. Effects of aerobic and microaerobic  
578 conditions on anaerobic ammonium-oxidizing (anammox) sludge. *Appl Environ Microbiol*  
579 63:2446-2448.
- 580 50. Chen H, Athar R, Zheng G, Williams HN. 2011. Prey bacteria shape the community  
581 structure of their predators. *ISME J* 5:1314-1322.
- 582 51. Chen H, Young S, Berhane T-K, Williams HN. 2012. Predatory *Bacteriovorax*  
583 communities ordered by various prey species. *PLoS ONE* 7:e34174-11.
- 584 52. Torsvik V, Ovreas L, Thingstad TF. 2002. Prokaryotic diversity - Magnitude, dynamics,  
585 and controlling factors. *Science* 296:1064-1066.
- 586 53. Feng S, Tan CH, Cohen Y, Rice SA. 2016. Isolation of *Bdellovibrio bacteriovorus* from a  
587 tropical wastewater treatment plant and predation of mixed species biofilms assembled by  
588 the native community members. *Environ Microbiol* 18:3923-3931.
- 589 54. Wittebolle L, Marzorati M, Clement L, Balloi A, Daffonchio D, Heylen K, De Vos P,  
590 Verstraete W, Boon N. 2009. Initial community evenness favours functionality under  
591 selective stress. *Nature* 458:623-626.
- 592 55. Peter H, Beier S, Bertilsson S, Lindström ES, Langenheder S, Tranvik LJ. 2010. Function-  
593 specific response to depletion of microbial diversity. *ISME J* 5:351-361.
- 594 56. Knelman JE, Nemergut DR. 2014. Changes in community assembly may shift the  
595 relationship between biodiversity and ecosystem function. *Front Microbiol* 5:Article 424,  
596 1-4.
- 597 57. Hillebrand H, Bennett D, M, Cadotte M, W. 2008. Consequences of dominance: A review  
598 of evenness effects on local and regional ecosystem processes. *Ecology* 89:1510-1520.
- 599 58. Okabe S, Satoh H, Watanabe Y. 1999. In situ analysis of nitrifying biofilms as determined  
600 by in situ hybridization and the use of microelectrodes. *Appl Environ Microbiol* 65:3182-  
601 3191.
- 602 59. Schmidt I, van Spanning RJM, Jetten MSM. 2004. Denitrification and ammonia oxidation  
603 by *Nitrosomonas europaea* wild-type, and NirK- and NorB-deficient mutants.  
604 *Microbiology* 150:4107-4114.
- 605 60. Mori AS, Isbell F, Seidl R. 2018.  $\beta$ -Diversity, Community Assembly, and Ecosystem  
606 Functioning. *Trends in Ecology & Evolution* 33:549-564.
- 607 61. Persson F, Suarez M, Hermansson M, Plaza E, Wilén B-M. 2016. Community structure of  
608 partial nitrification-anammox biofilms at decreasing substrate concentrations and low  
609 temperature *Microb Biotechnol* 154:267-273.
- 610 62. Callahan BJ, McMurdie PJ, Holmes SP. 2017. Exact sequence variants should replace  
611 operational taxonomic units in marker-gene data analysis. *ISME J* 11:2639-2643.
- 612 63. Edgar RC. 2016. UNOISE2: improved error-correction for Illumina 16S and ITS amplicon  
613 sequencing. bioRxiv doi:doi: <http://dx.doi.org/10.1101/081257>:1-21.
- 614 64. McMurdie PJ, Holmes S. 2013. phyloseq: An R Package for Reproducible Interactive  
615 Analysis and Graphics of Microbiome Census Data. *PLOS ONE* 8:e61217.

- 616 65. Oksanen J, Blanchet FG, Friendly M, Kindt R, Legendre P, McGlenn D, Minchin PR,  
617 O'Hara RB, Simpson GL, Solymos P, Stevens MHH, Szoecs E, Wagner H. 2017. vegan:  
618 Community Ecology Package, <https://CRAN.R-project.org/package=vegan>.  
619 66. Love MI, Huber W, Anders S. 2014. Moderated estimation of fold change and dispersion  
620 for RNA-seq data with DESeq2. *Genome Biol* 15:550.  
621 67. McMurdie PJ, Holmes S. 2014. Waste Not, Want Not: Why Rarefying Microbiome Data Is  
622 Inadmissible. *PLOS Computational Biology* 10:e1003531.  
623 68. Jost L. 2006. Entropy and diversity. *Oikos* 113:363-375.  
624 69. Anderson MJ. 2001. A new method for non-parametric multivariate analysis of variance.  
625 *Austral Ecology* 26:32-46.  
626 70. Miklós I, Podani J. 2004. Randomization of presence - absence matrices: comments and  
627 new algorithms. *Ecology* 85:86-92.  
628 71. Gotelli NJ, McCabe DJ. 2002. Species co-occurrence: a meta-analysis of j. M. Diamond's  
629 assembly rules model. *Ecology* 83:2091-2096.  
630 72. Stegen JC, Lin X, Fredrickson JK, Chen X, Kennedy DW, Murray CJ, Rockhold ML,  
631 Konopka A. 2013. Quantifying community assembly processes and identifying features  
632 that impose them. *ISME J* 7:2069-2079.

633

## 634 **FIGURE LEGENDS**

635 **Fig 1.** Biofilm structure shown by EPS staining of cryosections. The biofilm-water interface is  
636 the upper side. A: Z400 biofilm. B: Z50 biofilm. Scale bar: 100  $\mu\text{m}$ . (C): Z400 (up) and Z50  
637 (down) biofilm carriers; a ruler in cm is shown for size comparison.

638 **Fig 2.** A: Richness ( ${}^0D$ ), diversity ( ${}^1D$ ) and evenness ( ${}^1D/{}^0D$ ) for the Z50 and Z400 biofilms. B:  
639 PCoA based on the Sørensen index ( $\beta_{\text{sor}}$ ).

640 **Fig 3.** (A) Standardized effect size for the Sørensen index ( $\beta_{\text{sor}}$ ); dashed lines indicate SES values  
641 of +2 and -2. B:  $\beta_{\text{sne}}$  (dissimilarity due to nestedness) and  $\beta_{\text{sim}}$  (turnover) values; the sum of  $\beta_{\text{sim}}$   
642 and  $\beta_{\text{sne}}$  is  $\beta_{\text{sor}}$ . (C) Beta diversity ratio. Values were estimated for pairwise comparisons among  
643 Z400 replicates (n=10), Z50 replicates (n=10) and between the two groups.

644 **Fig. 4.** (A) Relative read abundance of nitrifiers and anammox bacteria in Z50 and Z400. (B)  
645 Relative read abundance multiplied by total solids (TS) measurements for each carrier type. (C)  
646 Biovolume fractions of nitrifiers and anammox bacteria, as measured by qFISH.

647 **Fig. 5.** (A) FISH image of a Z400 biofilm cryosection; the water-biofilm interface is on the top.  
648 Green: *Nitrosomonas*. Red: *Nitrospira*. Yellow: *Nitrotoga*. Blue: *Brocadia*. Grey: SYTO. (B)  
649 FISH-based population distribution at different biofilm depths in Z400. (C) FISH image of a Z50  
650 biofilm cryosection; the water-biofilm interface is on the top. Green: *Nitrosomonas*. Red:  
651 *Nitrospira*. Yellow: *Nitrotoga*. Grey: SYTO.

652 **Fig. 6.** DO concentrations profiles in the Z50 and Z400 biofilms. The shaded regions show  
653 ranges of DO concentration profiles resulting from different assumption about the fraction of the  
654 total dry solids on the carriers that is active bacteria. The dashed horizontal lines show the  
655 biofilm-liquid interface.

656 **Fig. 7.** Potential conversion rates by carrier type during aerobic oxidation of  $\text{NH}_4^+$  (A), aerobic  
657 oxidation of  $\text{NO}_2^-$  (B) and anoxic oxidation of  $\text{NH}_4$  (C) during batch tests. Significant  
658 differences between Z50 and Z400 (ANCOVA,  $p < 0.05$ ) are shown with (\*). Red: Z400, Blue:  
659 Z50.

660

661

## 662 SUPPLEMENTAL INFORMATION

663 **Fig. S1. Log<sub>2</sub>fold (DESeq2) changes for the 40 most abundant SVs based on average**  
664 **abundance**

665 Phylum, order and genus classification are shown. Each circle represents an SV. The size of the  
666 circle is proportional to the total sequence read abundance for the SV. A negative log<sub>2</sub> fold  
667 change indicates that SV are more abundant in Z400 biofilm, while a positive log<sub>2</sub> fold change  
668 indicates SVs more abundant in Z50 biofilms.

669 **Fig. S2. Log<sub>2</sub>fold (DESeq2) changes for *Bdellovibrionales* SVs.**

670 Genus classification is shown. Each circle represents an SV. The size of the circle is proportional  
671 to the total sequence read abundance for the SV. A negative log<sub>2</sub> fold change indicates that SV  
672 are more abundant in Z400 biofilm, while a positive log<sub>2</sub> fold change indicates SVs more  
673 abundant in Z50 biofilms. SVs with a NA  $p_{(adj)}$  value (DESeq2) are not shown.

674 **Fig. S3. Density profiles and biomass distribution for the DO model**

675 A and B: Biofilm density profiles (total dry solids) in the Z50 and Z400 biofilms respectively. C:  
676 Assumed biomass distribution in the Z400 biofilm based on input from qFISH and cryosection  
677 FISH images

678 **Table S1.** FISH probes used in this study

679 **Table S2.** Notation used in the DO model.

680 **Table S3.** Kinetic rate expressions used in the DO model.

681 **Table S4.** Stoichiometric matrix used in the DO model

682 **Table S5.** Kinetic and stoichiometric coefficients used in the DO model.

683 **Table S6.** Default input values for physical parameters used in the DO model.

684 **Text S1.** Supplemental Material and Methods

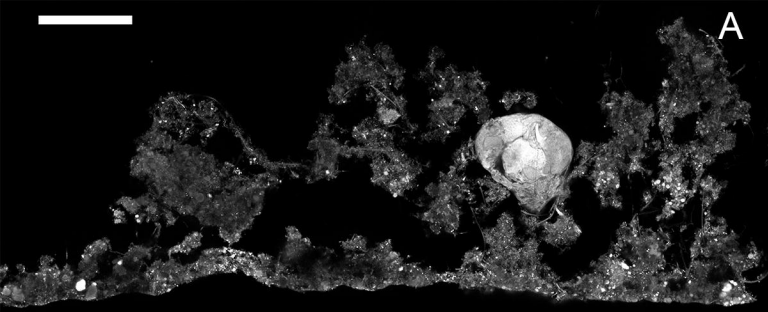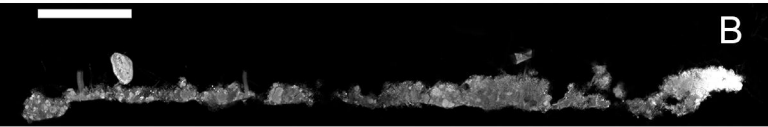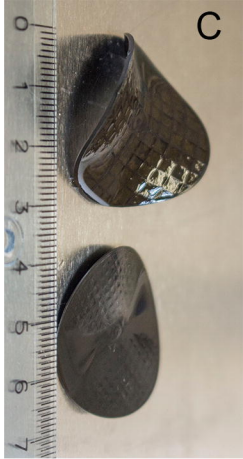



**A**

Standardized effect size Sørensen

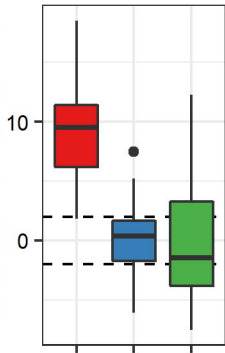**B**

Pairwise diversity

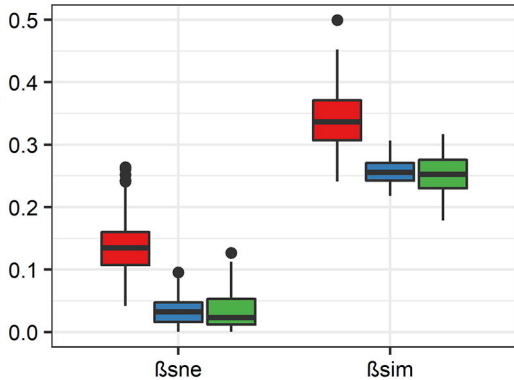**C**

Beta diversity ratio

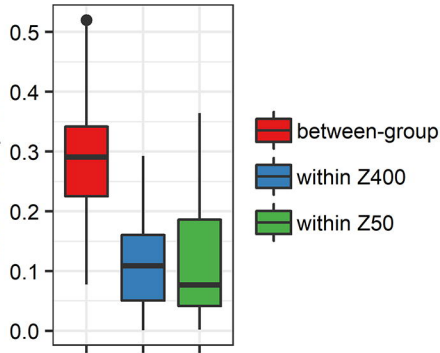

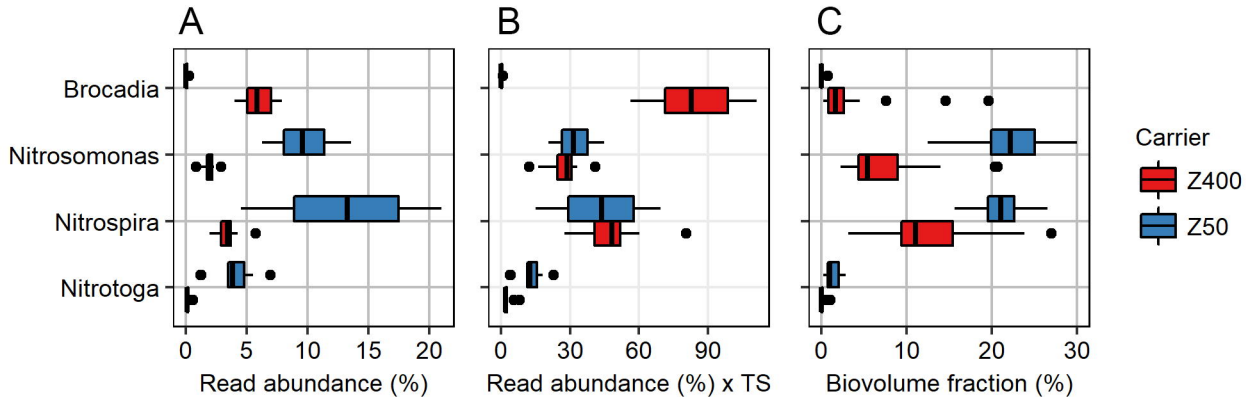



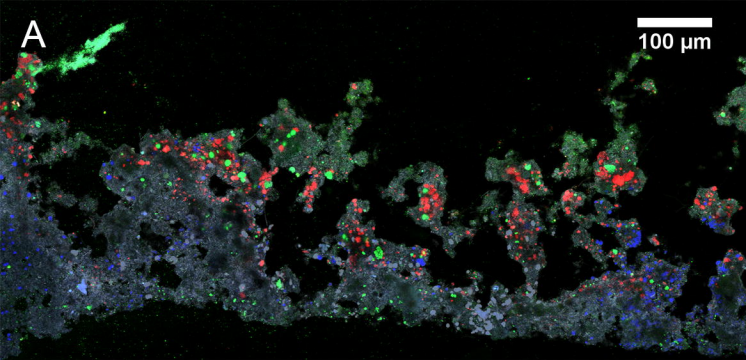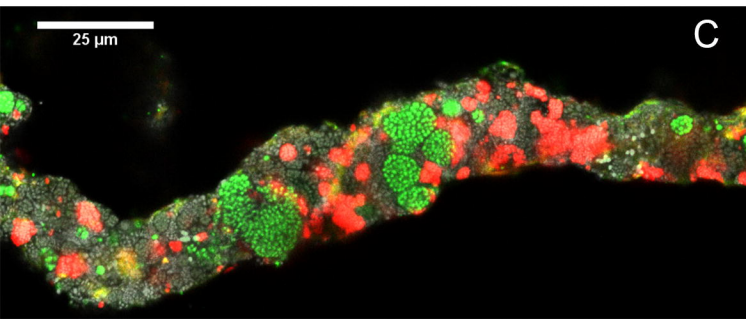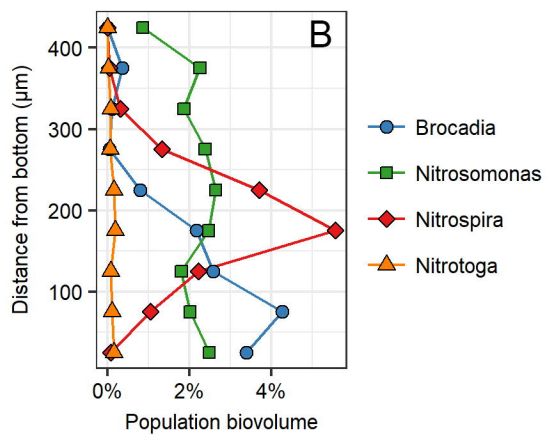

## Z50

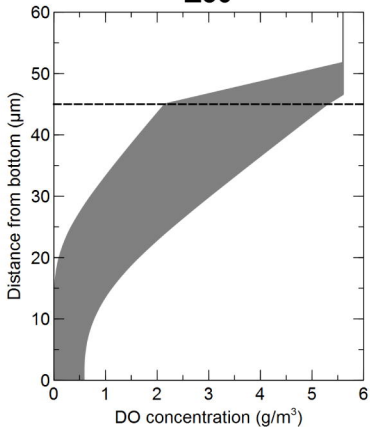

## Z400

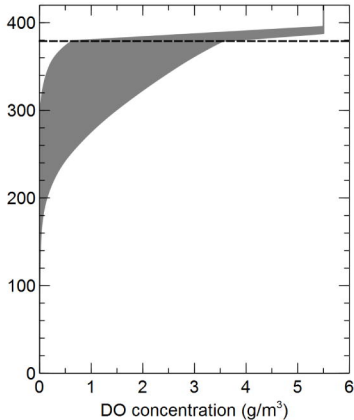

Aerobic  $\text{NH}_4^+$  removal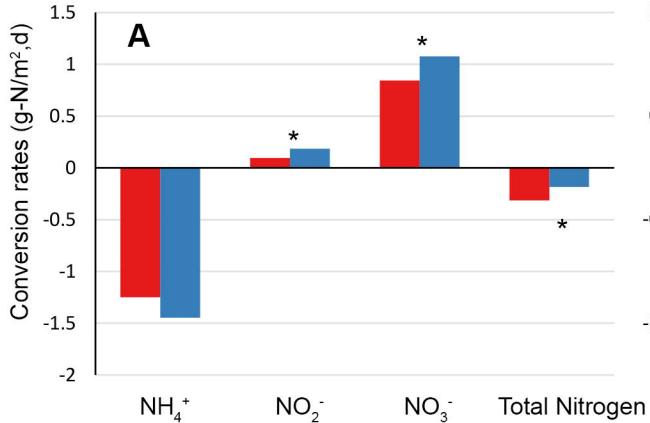Aerobic  $\text{NO}_2^-$  removal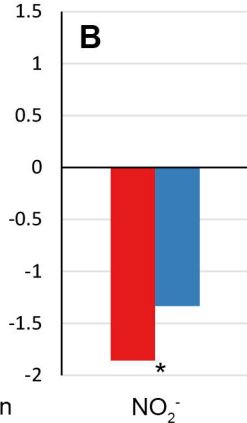Anoxic  $\text{NH}_4^+$  and  $\text{NO}_2^-$  removal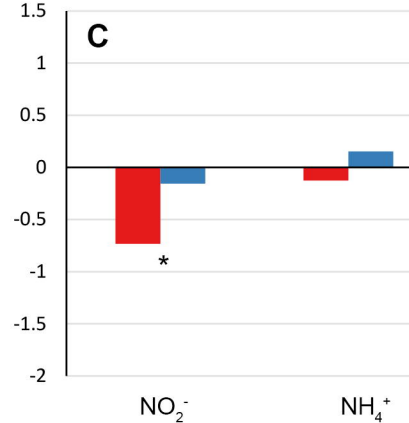

Source: https://www.biorxiv.org/content/10.1101/416701v1.full.pdf
